# Supplementary material for: Subversion of the Heme Oxygenase-1 Antiviral Activity by Zika Virus
Source: MDPI journal article supplement (doi:10.3390/v11010002), 2018-12-20
Supplement: s1 [file s1]

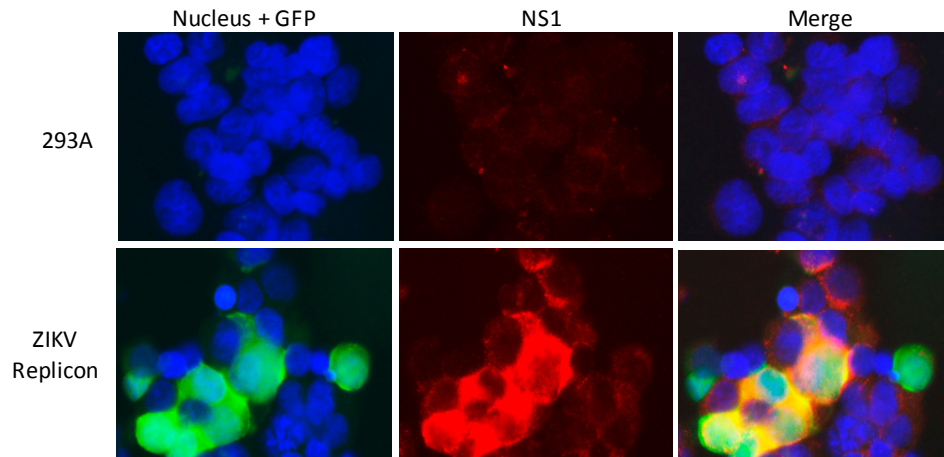

S1. Supplemental data

**NS1 expression in ZIKV replicon cells.** Fluorescence microscopy images of ZIKV replicon cells (GFP positive) after immunostaining of NS1 (red) with antibody against NS1 (abcam).

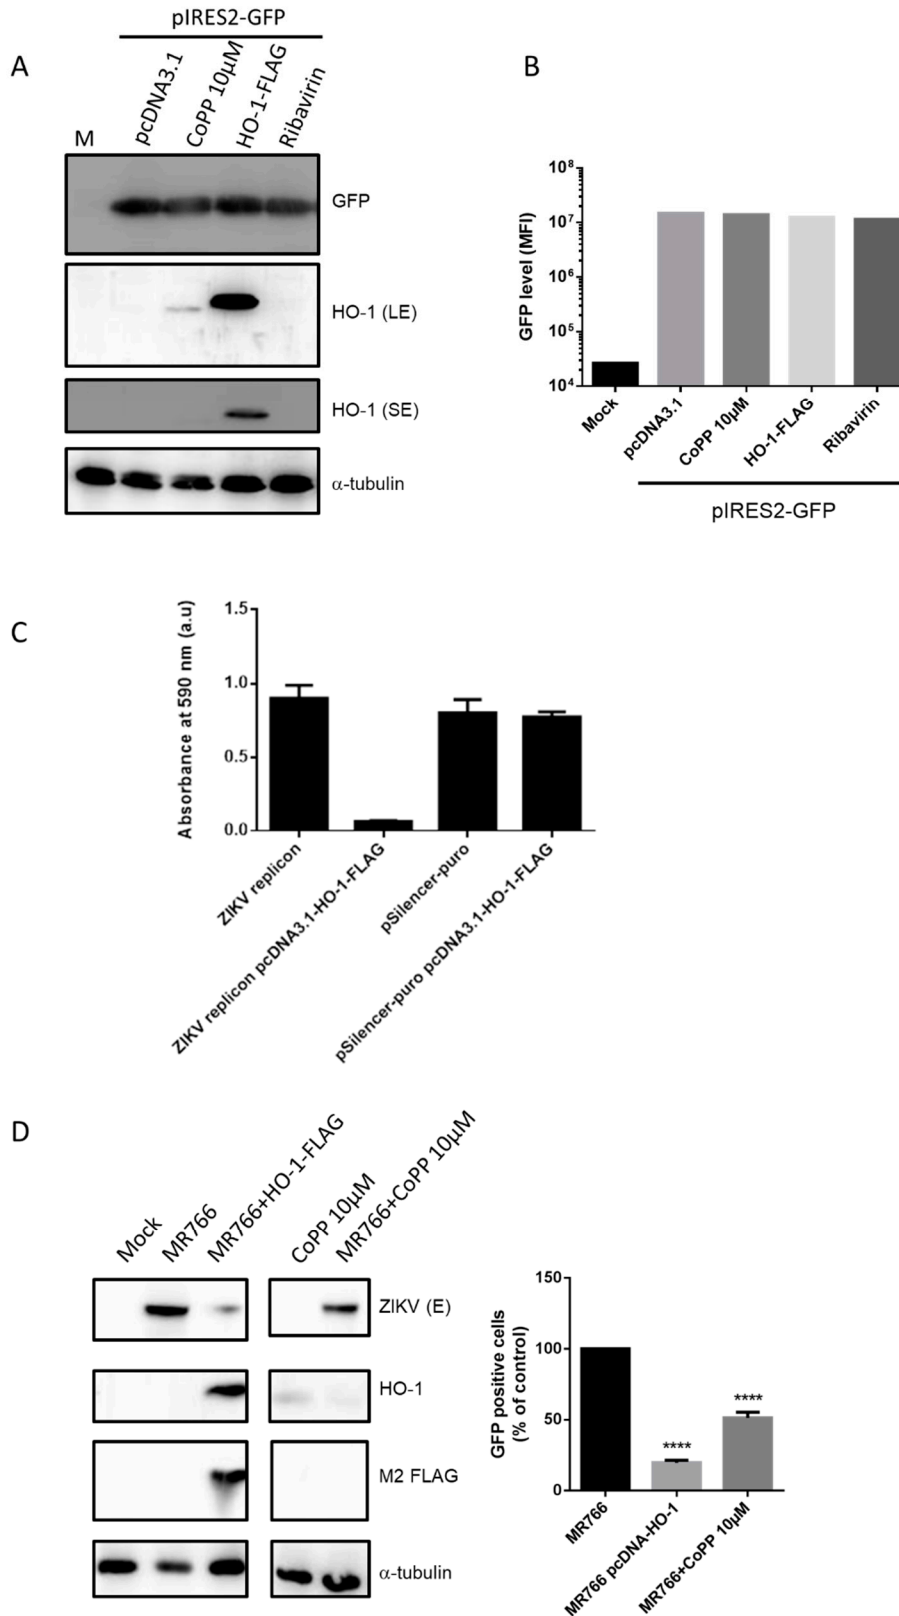

S2. Supplemental data

**A. and B. Overexpression or induction by CoPP of HO-1 do not interfere with CMV driven GFP expression.** HEK-293T were transfected with pIRES2-GFP or mock transfected. 24h after cells were transfected with pcDNA3.1-HO-1-FLAG or treated with CoPP at 10  $\mu$ M or Ribavirin (164 $\mu$ M) for 16h. After treatment cells were harvest for western blot (A) or cytometer analysis (B). (LE: Long exposure, SE: short exposure).

**C. Overexpression of HO-1 in HEK-293A cells does not induce mortality.** HEK-293A cells were transfected with pSilencer-Puro plasmid (Ambion) with lipofectamine after 5 days of growth with  $1\mu\text{g.mL}^{-1}$  of puromycin and cells were transfected with pcDNA3.1 or pcDNA3.1-HO-1-FLAG, after 24h, cells were treated for 7 days of with G418 and puromycin and stain with crystal violet.

**D. Overexpression or induction by CoPP of HO-1 are able to downregulate MR766-GFP ZIKA virus replication.** 293T were transfected with pcDNA3.1-HO-1-FLAG followed by infection with MR766-GFP ZIKA. For induction with CoPP, 2h post-infection, CoPP were added at  $10\mu\text{M}$  for 16h. and infected or treated with CoPP at  $10\mu\text{M}$ . After treatment cells were harvest for western blot or cytometer analysis.

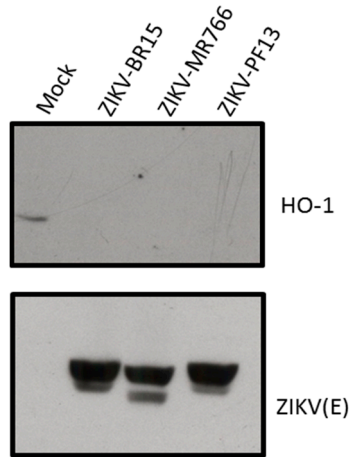

### S3. Supplemental data

**Different lineages of ZIKV down-regulate HO-1 expression.** Western blot analysis of HO-1 expression during ZIKV infection with different lineages in Vero cells after 48h at MOI of 1. Viruses have been described previously [13]. Expression of E-ZIKV protein was followed using the pan flavivirus antibody 4G2.

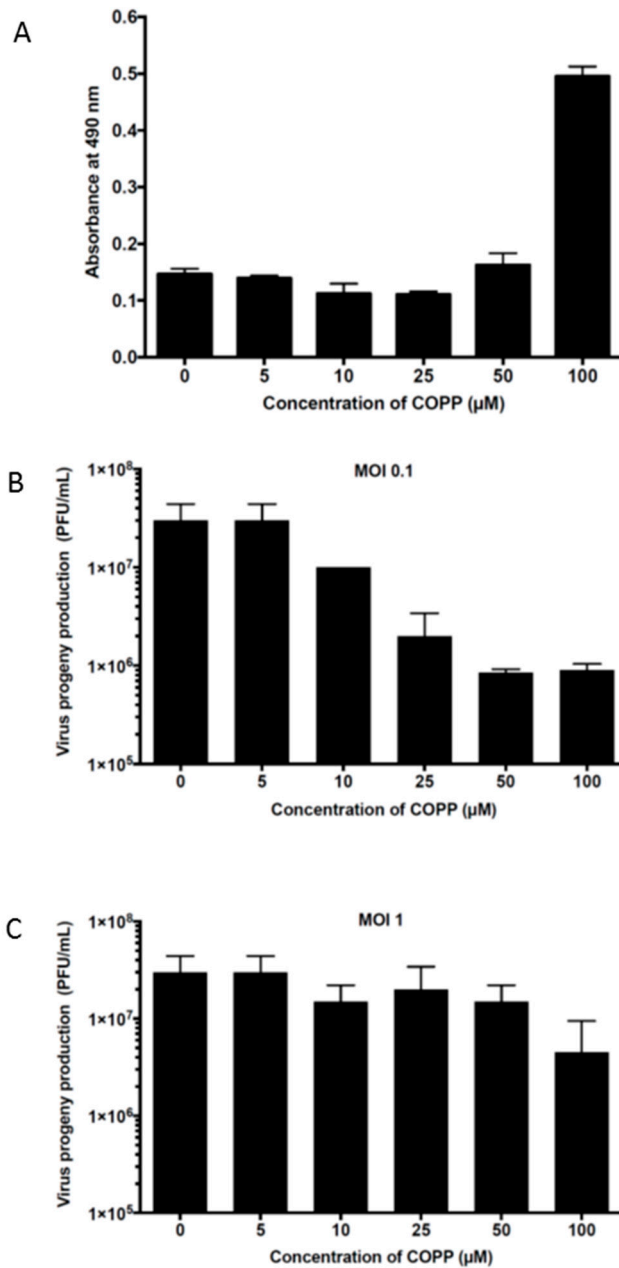

S4. Supplemental data

**Induction of HO-1 with CoPP decreases the viral progeny production of ZIKV-PF13 only at lower MOI. (A)** Vero cells were treated with different concentration of CoPP during 48 h. LDH release was quantified at 48 h post-treatment. Vero cells were infected with ZIKV-PF13 at MOI of 0.1 (B) and MOI of 1 (C). 2 h post infection CoPP were added at different concentrations. Viral progeny production was determined after 24 h of infection.
